# Supplementary material for: Y-chromosome diversity characterizes the Gulf of Oman
Source: Springer Nature journal article supplement (doi:10.1038/sj.ejhg.5201934), 2007-10-10
Supplement: 41431_2008_BF5201934_MOESM5_ESM.xls [file 41431_2008_BF5201934_MOESM5_ESM.xls]

## Sheet: Sheet1
Supplementary Table 5: Y-STR data for Haplogroup E3b1c-M123
Population	Sample Info	DYS456	DYS389I	DYS390	DYS389II	DYS458	DYS19	DYS385a	DYS385b	DYS393	DYS391	DYS439	DYS635	DYS392	Y GATA H4	DYS437	DYS438	DYS448
UAE	UAE22	15	13	24	30	17	12	18	18	13	10	13	21	11	11	14	10	20
	UAE29	15	12	24	30	17	13	16	18	13	10	12	22	11	9	14	10	20
	UAE41	16	13	25	30	15	14	16	17	13	10	11	21	11	10	14	10	20
	UAE74	15	13	25	30	15	13	16	17	13	10	11	21	11	10	14	10	20
	UAE144	16	13	25	31	15	13	17	17	13	10	12	21	11	10	14	10	20
Yemen	Yem20	17	13	23	31	17	13	16	16	13	11	12	22	11	11	14	10	20
	Yem28	15	13	24	30	18	13	17	17	13	10	12	23	11	11	14	10	20
	Yem35	17	13	24	32	19	13	16	16	13	10	11	22	11	11	14	10	20
	Yem41	15	13	24	31	18	13	16	16	13	10	12	21	11	11	14	10	20
	Yem52	15	13	24	31	17	13	15	17	13	10	12	22	11	9	14	10	20
